# Supplementary material
Source: PubMed Central journal article supplement (PMC10281748)
Supplement: suppl_fig_table_rpgrip1_ddad046.pdf [file suppl_fig_table_rpgrip1_ddad046.pdf]

# Supplementary Information

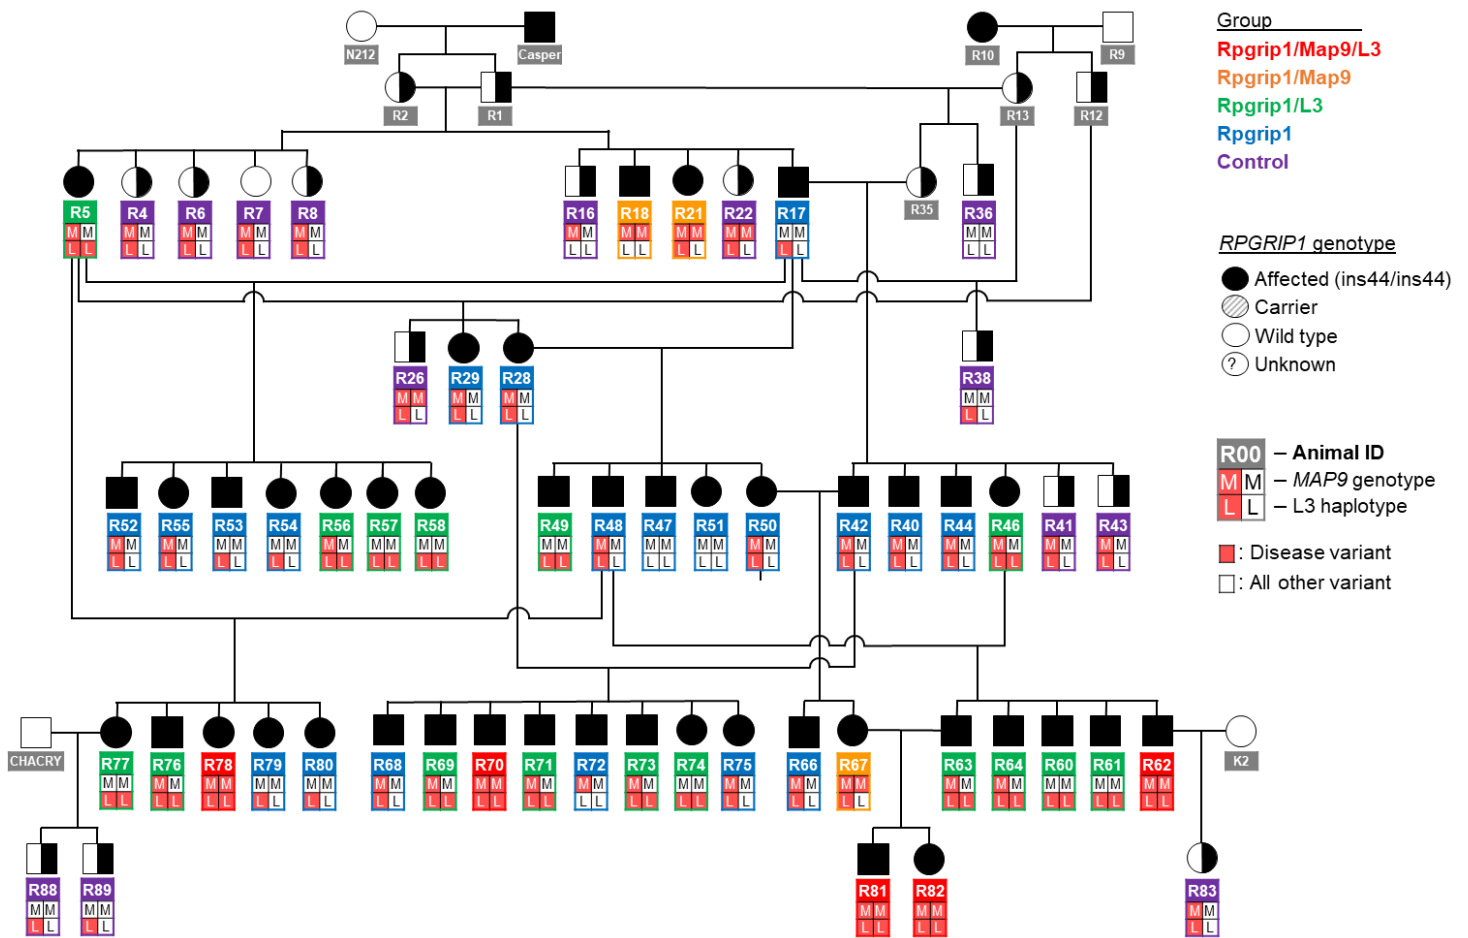

**Supplementary Figure 1. Segregation of the genotype combinations and their phenotypic variability in the canine pedigree studied.** The IDs of the animals enrolled in the current study are color-coded. Of the four original founders, three (Casper, R9, R10) were miniature longhaired dachshunds and one (N212) was a mix breed. The genotypes of the three loci, *RPGRIP1*, *MAP9*, and *L3*, associated with *cord1* are indicated. Circle, female; square, male.

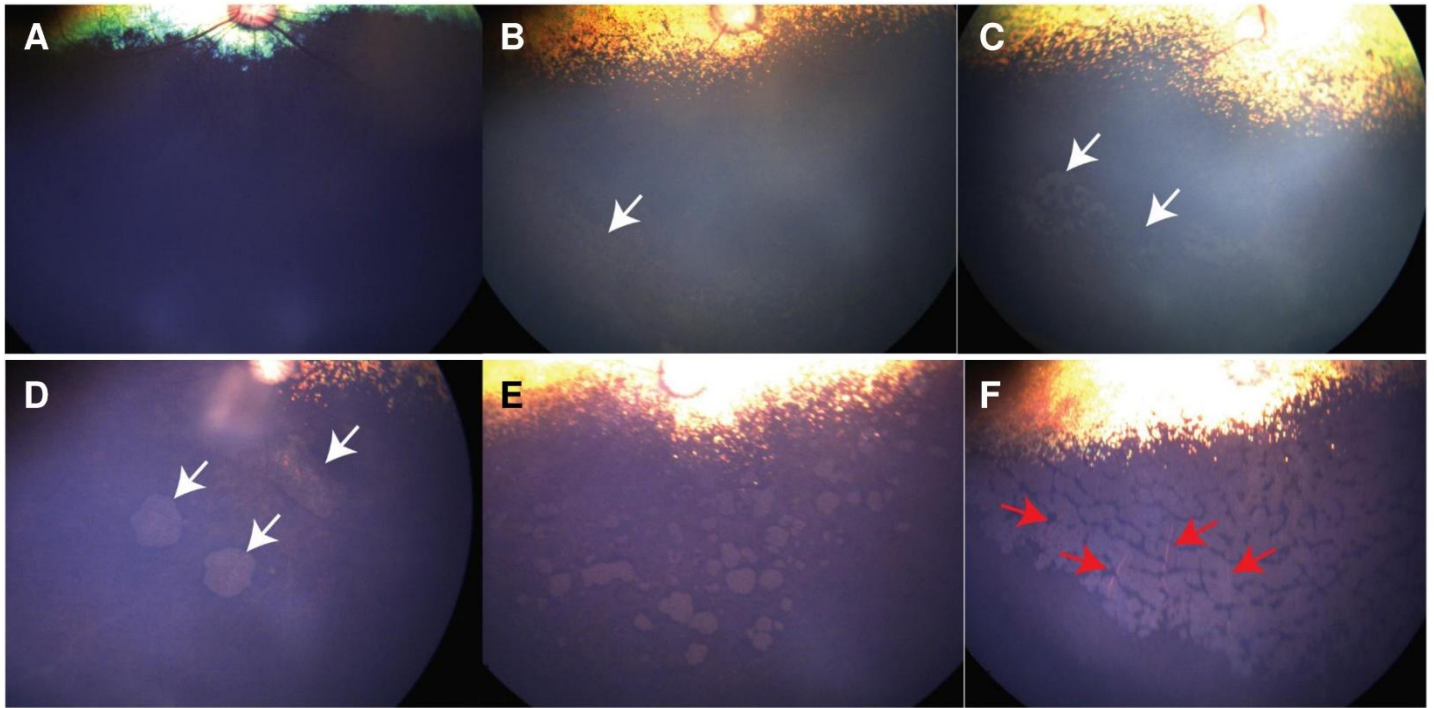

**Supplementary Figure 2. Illustration of the progression of retinal atrophy in the non-tapetal fundus in *RPGRIP1*<sup>ins/ins</sup> dogs.** (A) Normal non-tapetal canine fundus. (B-F) Non-tapetal canine fundus of *RPGRIP1* mutants representing early (B, C), mid (D, E), to advanced (F) disease stage. Initial changes include small areas of depigmentation (white arrows) corresponding to focal retinal atrophy. With progression, these lesions become more numerous and coalesce to encompass a broader area of the fundus (red arrows).

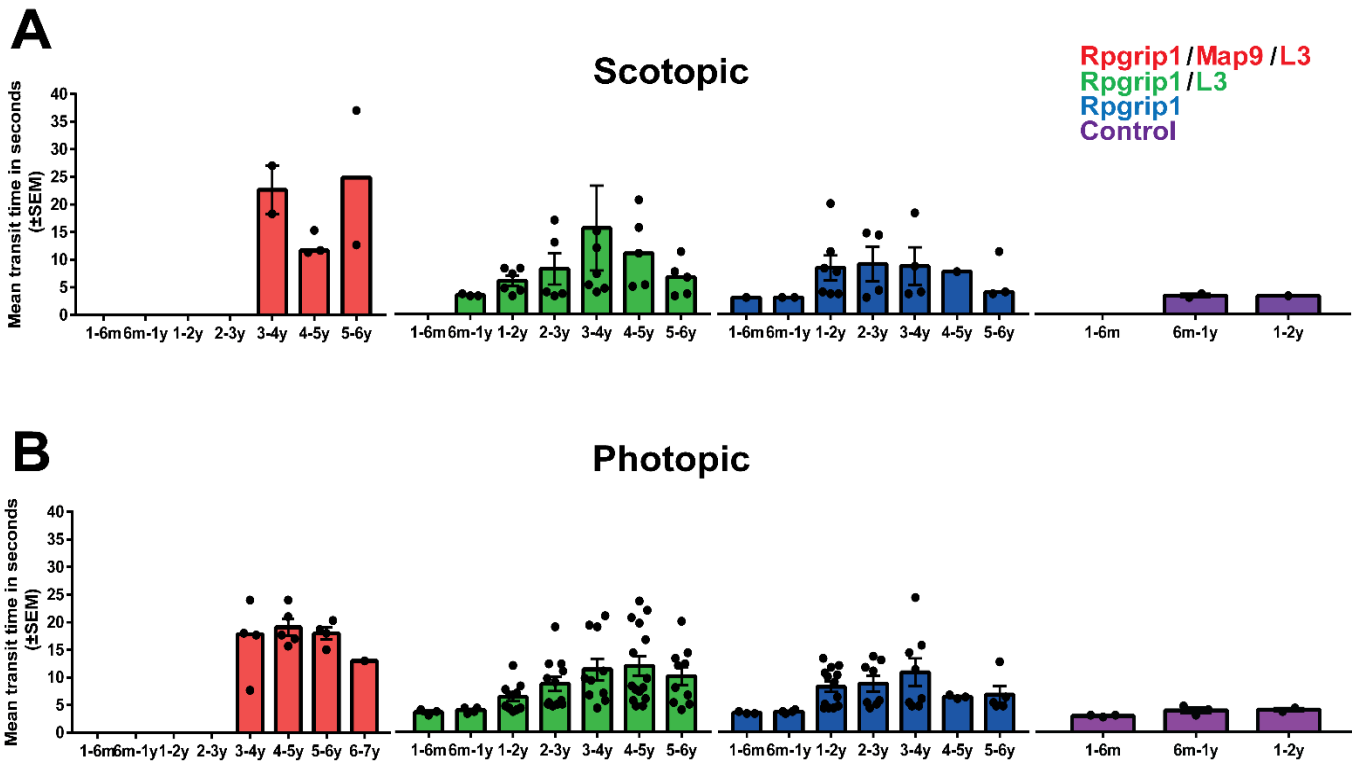

**Supplementary Figure 3. Longitudinal evaluation of scotopic and photopic vision-guided navigation in *RPGRIP1* canine mutants using an obstacle avoidance course.** Vision testing was repeated over time in an obstacle avoidance course under scotopic (A) and photopic (B) conditions in selected dogs from the Rpgrip1/Map9/L3, Rpgrip1/L3 and Rpgrip1 genotype groups as well as the control group. The time spent to complete the obstacle course is displayed (transit time) per age and group. The dashed lines represent the 95% confidence interval obtained from three normal animals unrelated to this study group. Error bars represent SD.

**Supplementary Table 1. Missense variants within L3 found in genes expressed in the retina**

| CFA30 (bp)        | Gene           | Alt (1)  | Ref (0)  | Alt allele freq. in DBMD | Alt allele freq. in Dog10K | Cases |     | Controls |     | cDNA change | Amino acid change | Impact (SnPEff) | Polyphen HumDiv                  | Polyphen HumVar                  | PROVEAN                     | Mut Pred2    | SIFT                    | FATHMM          | Vest Score |
|-------------------|----------------|----------|----------|--------------------------|----------------------------|-------|-----|----------|-----|-------------|-------------------|-----------------|----------------------------------|----------------------------------|-----------------------------|--------------|-------------------------|-----------------|------------|
|                   |                |          |          |                          |                            | R46   | R76 | R42      | R50 |             |                   |                 |                                  |                                  |                             |              |                         |                 |            |
| 9,162,384         | PLA2G4F        | G        | A        | NA*                      | 0.0647                     | 1/1   | 1/1 | 0/1      | 0/1 | c.377C>T    | p.Ser126Phe       | Moderate        | Benign (0.009)                   | Benign (0.018)                   | Neutral (0.208)             | 0.251        | Tolerated               | Tolerated       | 0.642      |
| 9,256,479         | GANC           | A        | G        | 0.4348                   | NA†                        | 1/1   | 1/1 | 0/1      | 0/1 | c.79G>A     | p.Val27Ile        | Moderate        | Benign (0.000)                   | Benign (0.001)                   | Neutral (0.229)             | 0.191        | Tolerated               | Tolerated       | 0.320      |
| <b>9,411,186</b>  | <b>ZNF106</b>  | <b>G</b> | <b>A</b> | <b>0.0363</b>            | 0.0337                     | 1/1   | 1/1 | 0/1      | 0/1 | c.3626A>G   | p.His1209Arg      | Moderate        | Benign (0.225)                   | Benign (0.057)                   | Neutral (-0.898)            | 0.083        | <b>Affects function</b> | Tolerated       | 0.368      |
| <b>9,626,620</b>  | <b>STARD9</b>  | <b>T</b> | <b>G</b> | <b>0.0357</b>            | 0.0354                     | 1/1   | 1/1 | 0/1      | 0/1 | c.5821G>T   | p.Ala1941Ser      | Moderate        | Possibly damaging (0.944)        | Possibly damaging (0.685)        | Neutral (-0.502)            | 0.047        | <b>Affects function</b> | Tolerated       | 0.103      |
| <b>9,634,432</b>  | <b>STARD9</b>  | <b>A</b> | <b>G</b> | <b>0.0354</b>            | 0.0354                     | 1/1   | 1/1 | 0/1      | 0/1 | c.13019G>A  | p.Arg4340His      | Moderate        | <b>Probably damaging (1.000)</b> | <b>Probably damaging (1.000)</b> | Neutral (-1.347)            | 0.444        | <b>Affects function</b> | Tolerated       | 0.713      |
| <b>9,940,463</b>  | <b>UBR1</b>    | <b>C</b> | <b>A</b> | <b>0.1398</b>            | NA†                        | 1/1   | 1/1 | 0/1      | 0/1 | c.1694A>C   | p.Lys565Thr       | Moderate        | Possibly damaging (0.810)        | Possibly damaging (0.474)        | <b>Deleterious (-3.608)</b> | 0.339        | Tolerated               | Tolerated       | 0.540      |
| 10,414,503        | PPIP5K1        | A        | G        | 0.1281                   | 0.0909                     | 1/1   | 1/1 | 0/1      | 0/1 | c.2336G>A   | p.Ser779Asn       | Moderate        | Benign (0.004)                   | Benign (0.020)                   | Neutral (-0.705)            | 0.277        | Tolerated               | Tolerated       | 0.285      |
| 10,426,046        | PPIP5K1        | A        | G        | 0.2140                   | NA†                        | 1/1   | 1/1 | 0/1      | 0/1 | c.86G>A     | p.Gly29Glu        | Moderate        | Benign (0.061)                   | Benign (0.025)                   | Neutral (-0.752)            | 0.190        | Tolerated               | Tolerated       | 0.077      |
| <b>10,538,649</b> | <b>SERINC4</b> | <b>A</b> | <b>G</b> | <b>0.0639</b>            | 0.0409                     | 1/1   | 1/1 | 0/1      | 0/1 | c.1300G>A   | p.Ala434Thr       | Moderate        | <b>Probably damaging (1.000)</b> | <b>Probably damaging (0.998)</b> | <b>Deleterious (-3.075)</b> | <b>0.877</b> | <b>Affects function</b> | Tolerated       | 0.302      |
| 10,561,536        | WDR76          | C        | A        | 0.1899                   | NA†                        | 1/1   | 1/1 | 0/1      | 0/1 | c.22A>C     | p.Ser8Arg         | Moderate        | Benign (0.164)                   | Benign (0.041)                   | Neutral (-0.314)            | 0.110        | Tolerated               | <b>Damaging</b> | 0.231      |
| 10,603,246        | WDR76          | T        | C        | 0.1394                   | NA†                        | 1/1   | 1/1 | 0/1      | 0/1 | c.1469C>T   | p.Pro490Leu       | Moderate        | Possibly damaging (0.886)        | Possibly damaging (0.764)        | Neutral (-1.952)            | 0.200        | <b>Affects function</b> | Tolerated       | 0.520      |
| 11,422,211        | C15orf43       | T        | C        | 0.4925                   | NA†                        | 1/1   | 1/1 | 0/1      | 0/1 | c.449C>T    | p.Ser150Phe       | Moderate        | Possibly damaging (0.852)        | Possibly damaging (0.431)        | <b>Deleterious (-2.788)</b> | 0.183        | Tolerated               | Tolerated       | 0.189      |

CFA, canis familiaris chromosome; Alt, alternative nucleotide; Ref, reference nucleotide (CanFam3.1). The 9,162,384 position variant has been remapped from canFam4 with the NCBI remapping service.

NA\*, Non-detection of the variant under the CanFam3.1 assembly. NA†, Failure to pass the 0.1 MAF threshold.

**Supplementary Table 2. Fundus score based on ophthalmic changes detected on retinal photographs (refer to Fig. 2).**

| Score    | Stage of degeneration | Dark discoloration |                            | Hyper-reflectivity |
|----------|-----------------------|--------------------|----------------------------|--------------------|
|          |                       | Severity           | Location                   |                    |
| <b>1</b> | <b>Incipient</b>      | Incipient          | Periphery                  | Absent             |
| <b>2</b> | <b>Early</b>          | Mild               | Superior tapetum (1/2)     | Absent             |
| <b>3</b> | <b>Mid</b>            | Moderate           | Superior tapetum (1/2-2/3) | Mild               |
| <b>4</b> | <b>Advanced</b>       | Severe             | Superior tapetum (>2/3)    | Moderate           |
| <b>5</b> | <b>End-stage</b>      | Terminal           | Generalized                | Severe             |
